# Supplementary material for: Simple preparation of 1D hierarchical magnetic CNTs/hollow porous macroscopic carbon fiber composites for efficient microwave absorption
Source: Royal Society of Chemistry journal article supplement (doi:10.1039/d4ta03562c), 2024-01-01
Supplement: d4ta03562c1.pdf [file d4ta03562c1.pdf]

**Simple preparation of 1D hierarchical magnetic CNTs/hollow porous  
macroscopic carbon fiber composites for efficient microwave absorption**

Minghang Yang <sup>a,b,c</sup>, Yu Deng <sup>a,b,c</sup>, Mingguang Zhang <sup>a,b,c</sup>, Shuaining Zhou <sup>a,b,c</sup>,  
Cheng Liu <sup>a,b,c\*</sup>, Xigao Jian <sup>a,b,c</sup>, Yousi Chen <sup>a,b,c\*</sup>

<sup>a</sup> State Key Laboratory of Fine Chemicals, Frontier Science Center for Smart Materials, Department of Polymer Science & Materials, School of Chemical Engineering, Dalian University of Technology, Dalian, 116024, China.

<sup>b</sup> Technology Innovation Center of High Performance Resin Materials, Liaoning Province.

<sup>c</sup> Dalian Basalt Fiber Resin Matrix Composite Engineering Research Center, Dalian.

---

\* Corresponding author. E-mail address: liuch1115@dlut.edu.cn (L. Cheng),

\* Corresponding author. E-mail address: chenyouisi@dlut.edu.cn (Y. S. Chen).

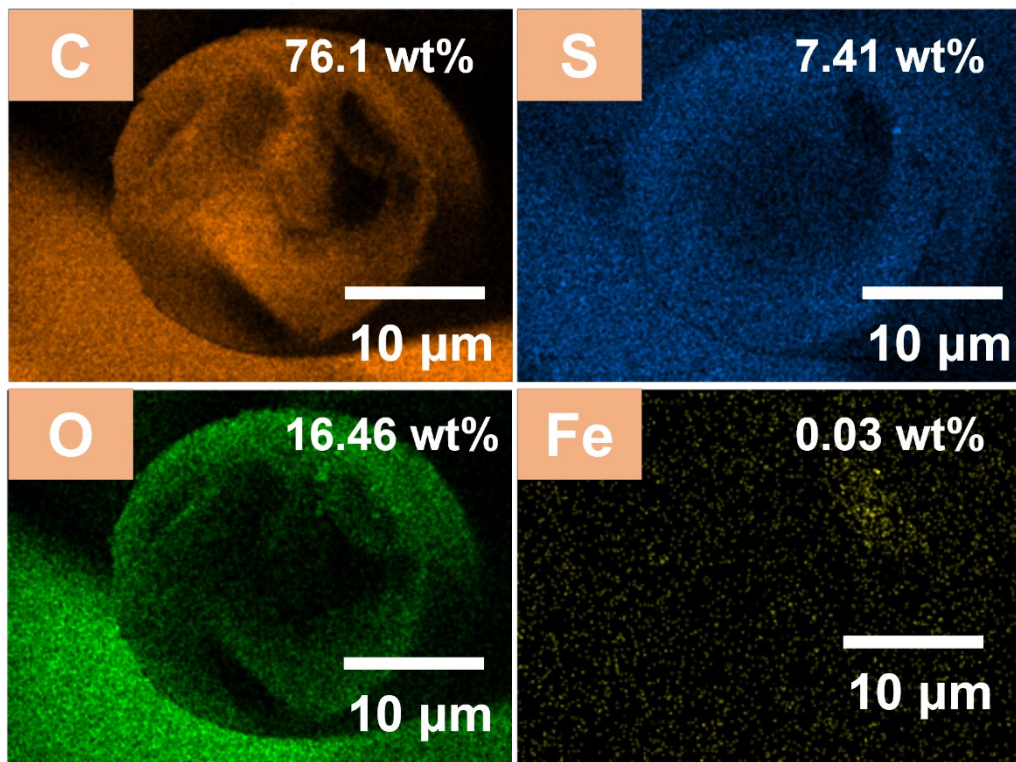

Fig S1.EDS images of Fe@SFs-1

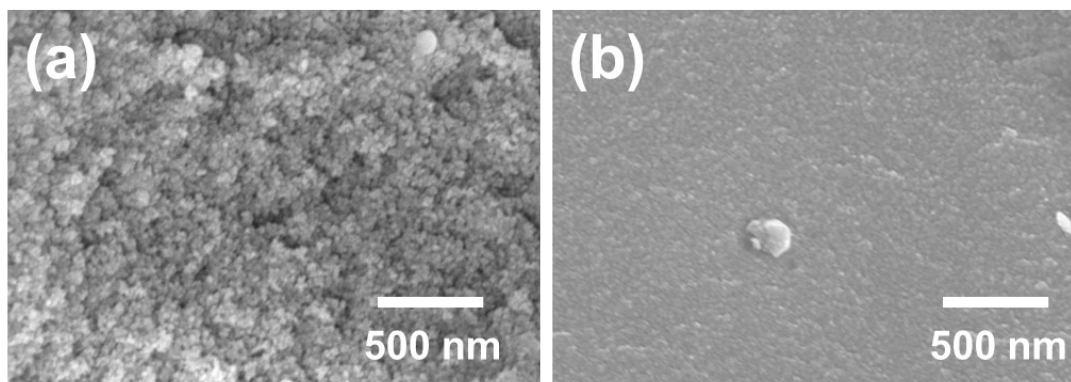

Fig S2. High magnification SEM images of (a) the porous layer in the cross section of HPCFs-1 and (b) the cross-section of HPCFs-3

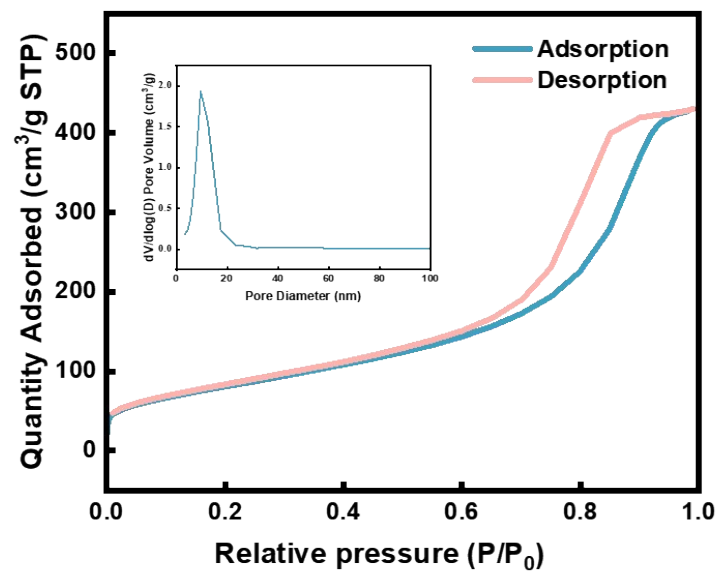

Fig S3. N<sub>2</sub> adsorption-desorption isotherms and pore size curves of HPCFs-1

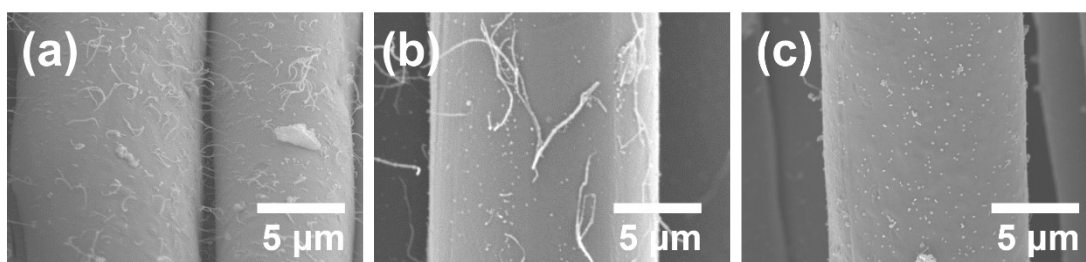

Fig S4. SEM images of surface of (a) CNTs@HPCFs-1, (b) CNTs@HPCFs-2, and (c) CNTs@HPCFs-3

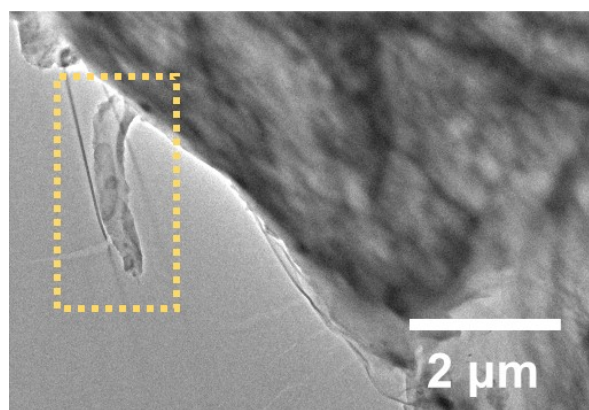

Fig S5. TEM images of surface of CNTs@HPCFs-1

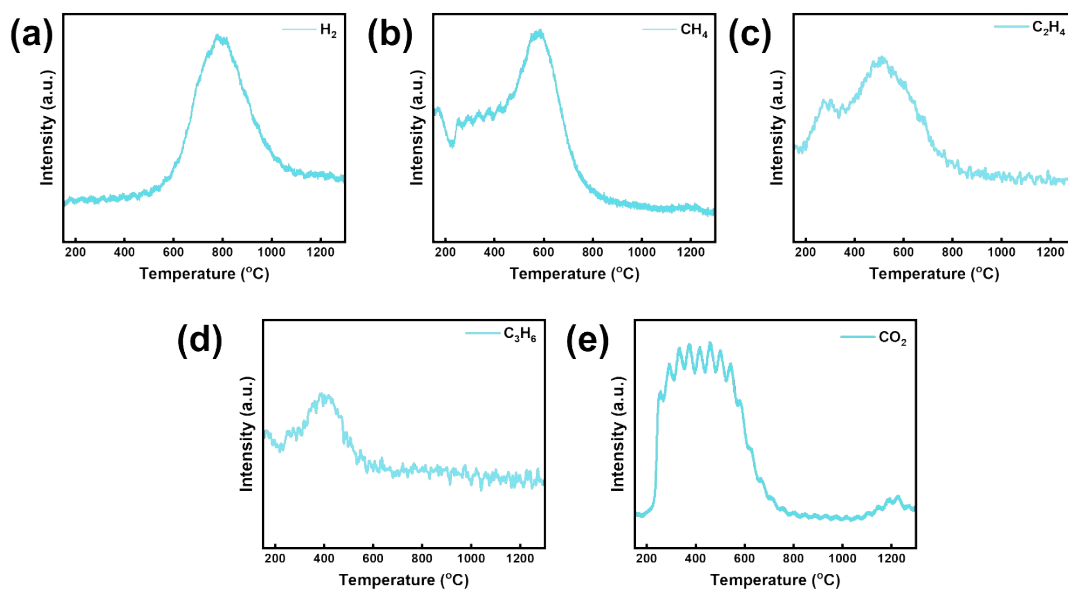

Fig S6. TGA-MS spectra of Fe@SFs-3

Table S1. Surface elemental content of fibers measured by XPS

| Sample       | C (Atomic %) | O (Atomic %) | S (Atomic %) | Fe (Atomic %) |
|--------------|--------------|--------------|--------------|---------------|
| HPCFs-1      | 95.88        | 3.87         | 0.26         | -             |
| CNTs@HPCFs-1 | 78.44        | 17.88        | 3.15         | 0.44          |

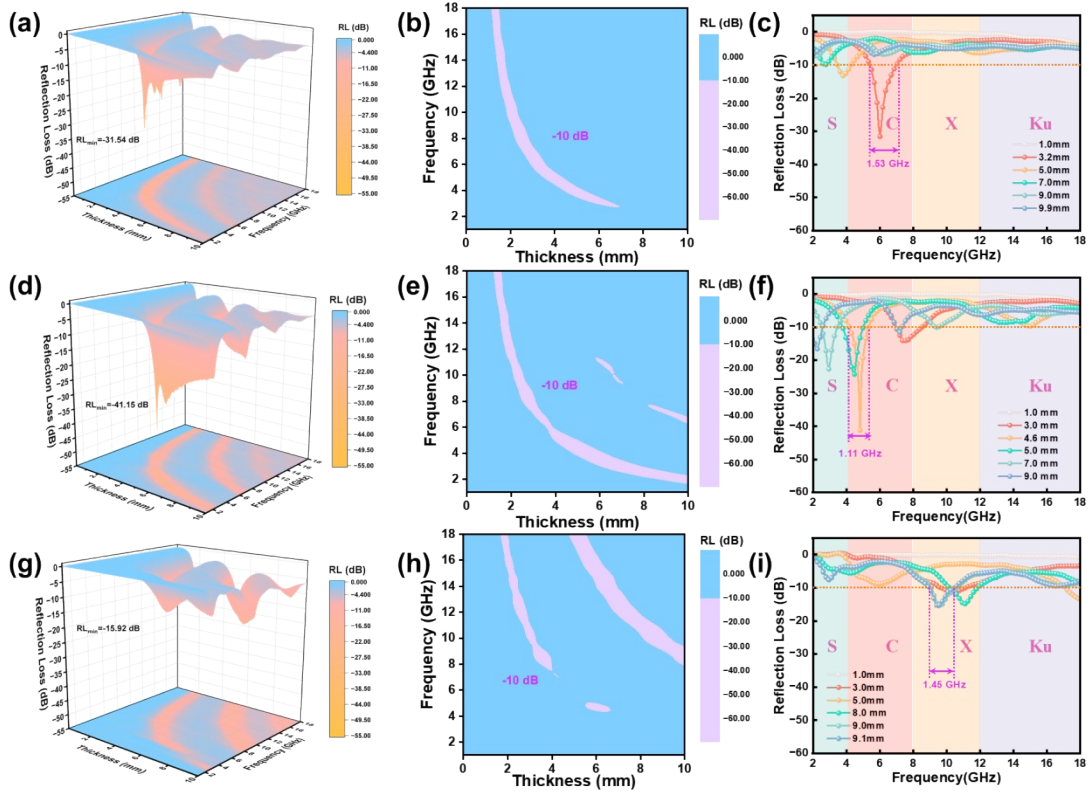

Fig S7. Calculated 3D/2D RL and contour maps of the RL of HPCFs-1 (a, b, c), HPCFs-2 (d, e, f), and HPCFs-3 (g, h, i)

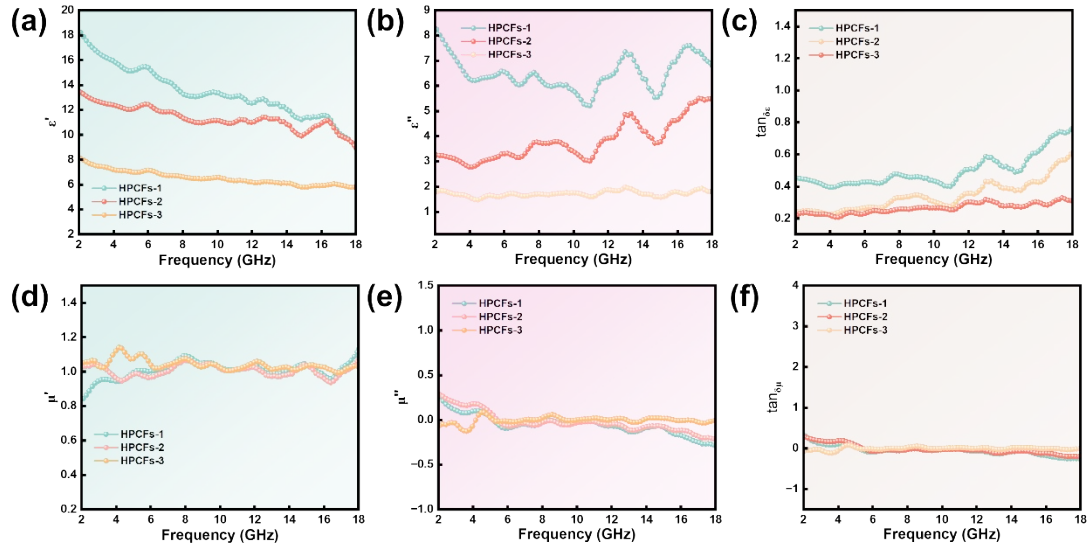

Fig S8. (a) Real permittivity ( $\epsilon'$ ), (b) imaginary permittivity ( $\epsilon''$ ), (c) dielectric loss tangent ( $\tan\delta_\epsilon$ ), (d) Real permeability ( $\mu'$ ), (e) imaginary permeability ( $\mu''$ ), and (f) magnetic loss tangent ( $\tan\delta_\mu$ ) of HPCFs

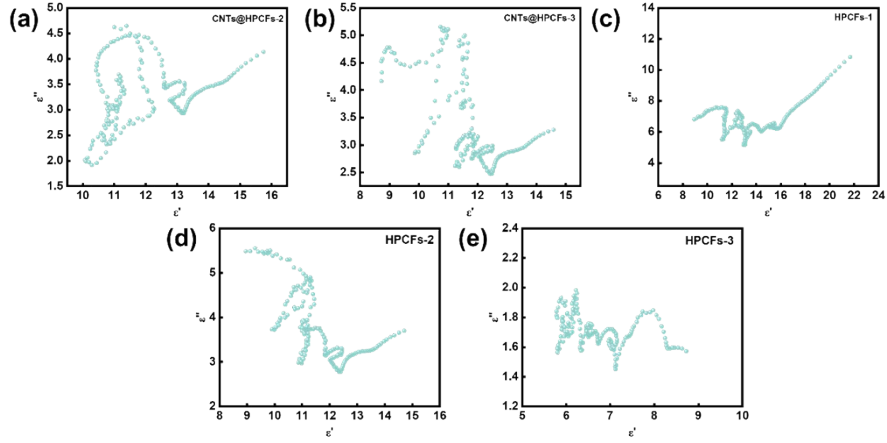

Fig S9. Cole-Cole curves of (a) CNTs@HPCFs-2, (b) CNTs@HPCFs-3, (c) HPCFs-1, (d) HPCFs-2, and (e) HPCFs-3

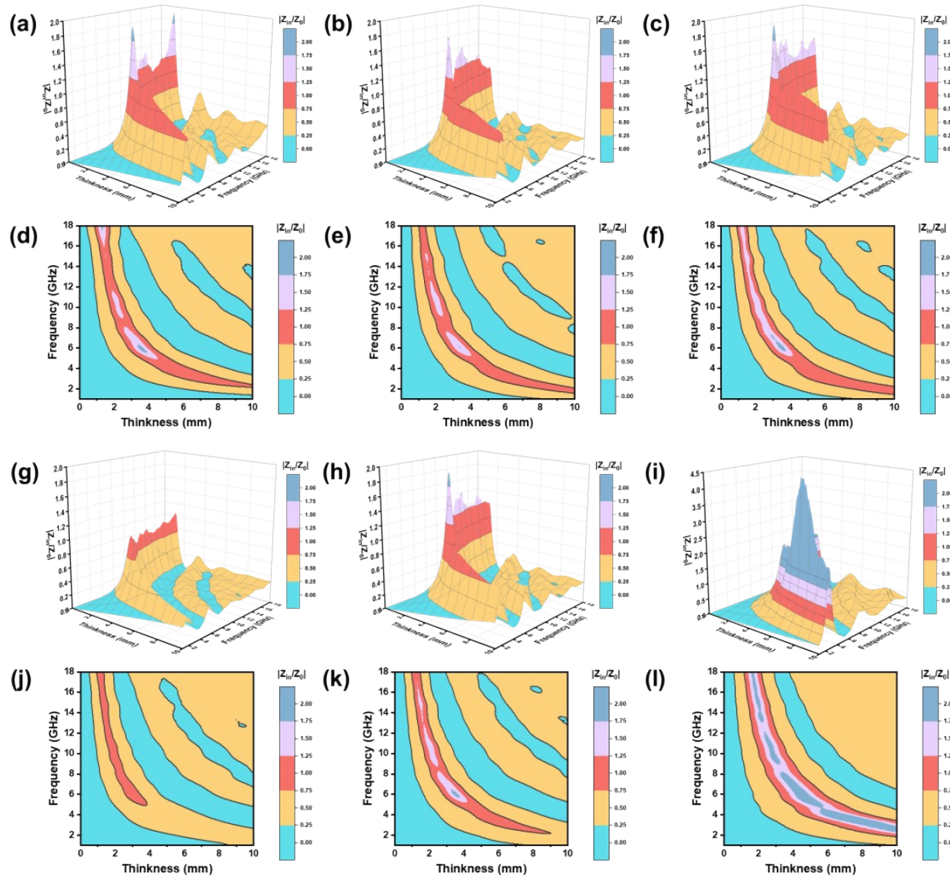

Fig S10. 3D and 2D contour maps of  $|Z_{in}/Z_0|$  for (a, d) CNTs@HPCFs-1, (b, e) CNTs@HPCFs-2, (c, f) CNTs@HPCFs-3, (g, j) HPCFs-1, (h, k) HPCFs-2, and (i, l)

HPCFs-3

Table S2. Comparison with reported microwave properties of carbon materials

| Microwave absorber       | Thickness (mm) | RL <sub>min</sub> (dB) | Effective bandwidth (GHz) | Reference |
|--------------------------|----------------|------------------------|---------------------------|-----------|
| Carbon microtubes        | 2.06           | -30.75                 | 6.78                      | [1]       |
| PAN-based carbon fiber   | 2.5            | -39.90                 | 1.30                      | [2]       |
| CNTs/CF                  | 1.18           | -56.11                 | 3.6                       | [3]       |
| GO/CF                    | 4.65           | -57.3                  | 4.88                      | [4]       |
| Porous carbon            | 2.2            | -30.46                 | 5.44                      | [5]       |
| Porous carbon nanosheets | 1.70           | -29.50                 | 7.2                       | [6]       |
| Porous carbon frameworks | 1.75           | -40.4                  | 3.48                      | [7]       |
| CNTs@HPCFs               | 1.90           | -54.03                 | 4.08                      | This work |

## Reference

[1] T. Ning, Q. Li, Q. Ren, J. Wang, Y. Sun and P. Zhang, Kapok fibers-derived carbon microtubes as efficient electromagnetic wave absorption materials, *Ceramics International*, 2023, 49, 29339-29347.

[2] S. Liu, J. Wang, B. Zhang, X. Su, X. Chen, Y. Chen, H. Yang, Q. Wu and S. Yang, Transformation of traditional carbon fibers from microwaves reflection to efficient

- absorption via carbon fiber microstructure modulation, *CARBON*, 2024, 219,
- [3] C. Wang, Y. Wang, H. Jiang, H. Tan and D. Liu, Continuous in-situ growth of carbon nanotubes on carbon fibers at various temperatures for efficient electromagnetic wave absorption, *CARBON*, 2022, 200, 94-107.
- [4] Y. Cao, Z. Cheng, R. Wang, X. Liu, T. Zhang, F. Fan and Y. Huang, Multifunctional graphene/carbon fiber aerogels toward compatible electromagnetic wave absorption and shielding in gigahertz and terahertz bands with optimized radar cross section, *CARBON*, 2022, 199, 333-346.
- [5] S. Wei, Z. Shi, W. Wei, H. Wang, D. Dastan, M. Huang, J. Shi and S. Chen, Facile preparation of ultralight porous carbon hollow nanoboxes for electromagnetic wave absorption, *Ceramics International*, 2021, 47, 28014-28020.
- [6] C. Gao, H. Zhang, D. Zhang, F. Gao, Y. Liu, X. Chen, D. Wu, M. Terrones and Y. Wang, Sustainable synthesis of tunable 2d porous carbon nanosheets toward remarkable electromagnetic wave absorption performance, *Chemical Engineering Journal*, 2023, 476,
- [7] Y. Mao, K. Liu, Y. Sheng, J. Liu, S. Fu and C. Tang, Hierarchical porous carbon frameworks derived from *juncus effusus* biomass with robust electromagnetic wave absorption properties, *Journal of Materials Chemistry C*, 2024, 12, 4442-4452.
